# Supplementary material for: Transcriptomic and Expression Analysis of the Salivary Glands in White-Backed Planthoppers, Sogatella furcifera
Source: PLoS One. 2016 Jul 14;11(7):e0159393. doi: 10.1371/journal.pone.0159393 (PMC4945012; doi:10.1371/journal.pone.0159393)
Supplement: S2 Table — (XLSX) [file pone.0159393.s002.xlsx]

## Sheet: Supplementary Table 2
Supplementary Table 2 Primers used in real-time qPCR for determination expression level of WBPH salivary protein genes
Gene	Forward primers (5'-3')	Reverse primers (5'-3')
Alpha-glucosidase family 31	CGAGTACAGTGTTGCCAACC	CTCTCCATAGCAGCTCTCCC
Neutral alpha-glucosidase AB	TGAGCATGCTGATTCGTTGG	CCACGTTTCAGCTGTGTTCA
Lysosomal alpha-glucosidase	TTTACGGCCTGGGAGTTCAT	AAGCACTCCAAACGACGAAC
Soluble trehalase	CCCCAGGCTGTATTCGTTCAT	GACTTCCATTGGGCACGAAAC
Membrane-bound trehalase	TCCGGAGAGCAATGGGACTA	TGGATCGCACCCATTTGTCA
UDP-N-acetylglucosamine pyrophosphorylase	GCAGCACAAAATCTCAAGGGC	CCCGATAAATACAGGGTCAGC
Glucose dehydrogenase [acceptor]	ACGCTGGTGGGATTTGTAGA	TCTCAGGACGCAACAGAACT
Alkaline phosphatase-like isoform X1	ACGTCTGGAAAAGCAGCAAG	TGATTCAAACTCGGCAAGGC
Multicopper oxidase 4	CCCTTCTGGTGTACACGGAT	CCCAATGGTGCCAACTGATC
Multicopper oxidase 6	TTGCCAACGGATCTAGCAGT	ATCGGCTGCCTGACTCAATA
Catalase	TGTTCCCCAGCTTCATCCAT	TTGACCAGCTTGAACGTGTG
Cytochrome P450 SF	CCAACAAACCGGAAGTGCAG	GTCTTCAGTGCAGAAACGCG
Cytochrome P450 CYPSF01	GCTGGGAAAGGACTAGCAGG	GCTGTTGTTTCACTGCCTCC
Cytochrome P450 CYPSF02	CCTGCTCTATTCTCTCGCCC	CGGCCTCCACTTTTACTCCA
Cytochrome P450 CYPSF03	AACGCCGACAAACTGAAAGC	TGTCCGTCGTGTTTCTCCAG
Cytochrome P450 CYPSF04	AGATGAGAAACAAGCGGCAG	GACGTTGTTGTTGTTCGCCA
NADPH-cytochrome P450 reductase	GGGTGAGGACGTGAGCATAC	GTGCATGCAAGACCGGTTTC
Putative acetylcholinesterase 1	GGTGACAACTGAGGACATGGA	CCACAATTTCGGGGTTTGCC
Angiotensin converting enzyme	GGATGTATGGAGGTGGGGAG	GAATTGTCCCGCCTTTTCAC
Carboxylesterase	AGAGGCCTGGTGAGTTGATC	ACAAACTCAGATGCCGGGTA
Prophenoloxidase activating factor 2	AAGAACGAGCTGTACCCACA	ACTGTTGCTGAGCTCATCCT
Serine protease snake-2	TCAGGGAGCGTTGATTCGAA	GTGACGGTCATCATTTGTGCA
Serine protease snake-4	CAATGCCAATGTGCATCCCG	CCTTCGACATTGCTCGTTCG
Serine protease snake-6	TAGGATGACGTGGGACTGCA	GTCATTATCGACGGCTGGGT
Serine protease-11	TAAATGACTGTCCGTGGGGC	TGGACGTATGCTGCAGTGAG
Uridine phosphorylase 1 isoform X2	TCAATGACGAACTGGAGCCT	TCCATTTTCTCAGCCTCGGT
Putative phosphorylase b kinase regulatory subunit beta	GATCAGCCTTCTACAAGCGC	TCATCGCTTCCAGAACCCAT
Prostatic acid phosphatase-like isoform X1	CACACCAGCCAGCACATATG	TGCATGCTCATCTTCGTTCG
Prostatic acid phosphatase	ATCGCATTCATTGGCAACCA	GTTCTTGCAGCTCCCTAAAGG
Rac-GTP binding protein	GCTGTCCCGTGGTCTTAGTC	CGGTGGGATGAAGGACTGCT
Calcium/calmodulin-dependent protein kinase 2 isoform X2	CGAGGTGAGGTGATGCATGT	GCGTCTTTGCCATCGAACTC
Calcium/calmodulin-dependent protein kinase type 1 isoform X3	GTCGTCCATAGAGATTTGAAGCC	AAACGTCCACAGCCTTTCCA
Ribosomal protein L9	CAAGATGAGAGCCGTGTA	CGAGTTGGTAACAGTGAC
Ribosomal protein L10	GCGACTTCATCCGTTCCA	CACTCTAGCCACTGTTCCTT
